# Supplementary material
Source: PubMed Central journal article supplement (PMC7494216)
Supplement: NIHMS1626398-supplement-supplementary.pdf [file NIHMS1626398-supplement-supplementary.pdf]

## Supplemental Material

**Title:** Lowering urinary phthalate metabolite concentrations among children by reducing contaminated dust in housing units: A randomized controlled trial and observational study

Clara G. Sears <sup>\*1</sup>, Bruce P. Lanphear <sup>2</sup>, Antonia M. Calafat <sup>3</sup>, Aimin Chen <sup>4</sup>, Julianne Skarha <sup>1</sup>, Yingying Xu <sup>5</sup>, Kimberly Yolton <sup>6</sup>, and Joseph M. Braun <sup>1</sup>

<sup>1</sup> Department of Epidemiology, Brown University, Providence, RI, USA

<sup>2</sup> Faculty of Health Sciences, Simon Fraser University, Burnaby, BC, Canada

<sup>3</sup> Centers for Disease Control and Prevention, Atlanta, GA, USA

<sup>4</sup> Department of Environmental Health, University of Cincinnati College of Medicine, Cincinnati, OH, USA

<sup>5</sup> Division of General and Community Pediatrics, Cincinnati Children's Hospital Medical Center, University of Cincinnati College of Medicine, Cincinnati, OH, USA

<sup>6</sup> Department of Pediatrics, Division of General and Community Pediatrics, Cincinnati Children's Hospital Medical Center, Cincinnati, OH, USA

### Corresponding author:

\*Clara G. Sears  
Email: [clara\\_sears@brown.edu](mailto:clara_sears@brown.edu)

**Number of pages:** 15

**Number of supplemental tables:** 13

## Table of Contents

Table S1. Description of dust accumulation and cleaning classifications used to assess in The HOME Study (Cincinnati, OH).

Table S2. Number of urine samples collected during annual visits at ages 1, 2, and 3 years for control and intervention groups (The HOME Study; Cincinnati, OH).

Table S3. Number of urine samples collected by season from children in the control and intervention group.

Table S4. Geometric mean and range of children's urinary phthalate metabolite concentrations (ng/mL) by yearly visits (The HOME Study; Cincinnati, OH).

Table S5. Median (25th, 75th percentile) of maternal urinary phthalate metabolite concentrations by intervention group (The HOME Study; Cincinnati, OH).

Table S6. Adjusted geometric mean and percent differences in childhood urinary phthalate metabolite concentrations (ng/mL) for the intervention group compared to the control group: Stratified by baseline dust accumulation (The HOME Study; Cincinnati, OH).

Table S7. Baseline characteristics for participants in the control and intervention group: Stratified by participant moving in the first 3 years (The HOME Study; Cincinnati, OH).

Table S8. Adjusted geometric mean and percent differences in childhood urinary phthalate metabolite concentrations (ng/mL) for the intervention group compared to the control group using a per protocol analysis with participants who moved before 36-month visit excluded (The HOME Study; Cincinnati, OH).

Table S9. Participant characteristics according to dust accumulation (The HOME Study; Cincinnati, OH).

Table S10. Adjusted geometric mean and percent differences in childhood urinary phthalate metabolite concentrations (ng/mL) according to dust accumulation (The HOME Study; Cincinnati, OH).

Table S11. Adjusted geometric mean and percent differences in childhood urinary phthalate metabolite concentrations (ng/mL) according to three categories of dust accumulation: Sensitivity analyses (The HOME Study; Cincinnati, OH).

Table S12. Adjusted geometric mean and percent differences in childhood creatinine-standardized urinary phthalate metabolite concentrations (ng/mL) for the intervention group compared to the control group: Sensitivity analyses (The HOME Study; Cincinnati, OH).

Table S13. Adjusted geometric mean and percent differences in childhood urinary phthalate metabolite concentrations (ng/mL) by dust accumulation: Sensitivity analyses considering different sets of covariates (The HOME Study; Cincinnati, OH).

Table S1. Description of dust accumulation and cleaning classifications used to assess in The HOME Study (Cincinnati, OH).

| <b>APPEARS CLEAN</b>                                                                                                                                                                                                                                                                                                                      | <b>SOME CLEANING / SLIGHT DUST</b>                                                                                                                                                                                                                                                                                                                                        | <b>NO EVIDENCE OF CLEANING / HEAVY DUST</b>                                                                                                                                                                                                                                                             |
|-------------------------------------------------------------------------------------------------------------------------------------------------------------------------------------------------------------------------------------------------------------------------------------------------------------------------------------------|---------------------------------------------------------------------------------------------------------------------------------------------------------------------------------------------------------------------------------------------------------------------------------------------------------------------------------------------------------------------------|---------------------------------------------------------------------------------------------------------------------------------------------------------------------------------------------------------------------------------------------------------------------------------------------------------|
| <p>No visible dust on most surfaces.<br/>           Evidence of recent vacuuming of carpet.<br/>           No matted or soiled carpeting.<br/>           No debris / food particles on surfaces<br/>           Few visible cobwebs.<br/>           Clean floor.<br/>           Clean window sills.<br/>           Clean window wells.</p> | <p>Slight dust buildup in corners.<br/>           Slight dust buildup on furniture.<br/>           Slightly matted and/or soiled carpeting<br/>           Some debris / food particles on surfaces<br/>           Some visible cobwebs.<br/>           Slightly soiled floor.<br/>           Slightly clean window sills.<br/>           Slightly clean window wells.</p> | <p>Heavy dust buildup in corners.<br/>           Heavy dust buildup on furniture.<br/>           Matted and/or soiled carpeting.<br/>           Visible cobwebs.<br/>           Heavily soiled floor.<br/>           Heavily soiled window sills.<br/>           Tremendous debris in window wells.</p> |

Table S2. Number of urine samples collected during annual visits at ages 1, 2, and 3 years for control and intervention groups (The HOME Study; Cincinnati, OH).

| Visit age | Total    |                             | Control Group |                             | Intervention Group |                             |
|-----------|----------|-----------------------------|---------------|-----------------------------|--------------------|-----------------------------|
|           | n (%)    | Age - years<br>Mean (range) | n (%)         | Age - years<br>Mean (range) | n (%)              | Age - years<br>Mean (range) |
| 1         | 250 (37) | 1.09 (0.94 - 1.61)          | 128 (37)      | 1.09 (0.94 - 1.51)          | 122 (36)           | 1.09 (0.97 - 1.61)          |
| 2         | 214 (31) | 2.09 (1.95 - 2.38)          | 106 (31)      | 2.08 (1.95 - 2.27)          | 108 (32)           | 2.09 (1.97 - 2.38)          |
| 3         | 216 (32) | 3.10 (2.88 - 3.63)          | 109 (32)      | 3.09 (2.88 - 3.50)          | 107 (32)           | 3.11 (2.93 - 3.63)          |

Table S3. Number of urine samples collected by season from children in the control and intervention group.

| <b>Season</b>              | <b>Total</b> | <b>Control</b> | <b>Intervention</b> |
|----------------------------|--------------|----------------|---------------------|
|                            | n (%)        | n (%)          | n (%)               |
| Spring (March-May)         | 199 (29)     | 98 (29)        | 101 (30)            |
| Summer (June-August)       | 165 (24)     | 92 (27)        | 73 (22)             |
| Fall (September-November)  | 133 (20)     | 71 (21)        | 62 (18)             |
| Winter (December-February) | 183 (27)     | 82 (24)        | 101 (30)            |

Table S4. Geometric mean and range of children’s urinary phthalate metabolite concentrations (ng/mL) by yearly visits (The HOME Study; Cincinnati, OH).

|       | <b>Age 1 Year</b> |           | <b>Age 2 Years</b> |           | <b>Age 3 Years</b> |           |
|-------|-------------------|-----------|--------------------|-----------|--------------------|-----------|
|       | GM<br>(95% CI)    | min, max  | GM<br>(95% CI)     | min, max  | GM<br>(95% CI)     | min, max  |
| ΣDEHP | 70 (62, 80)       | 3.3, 4320 | 79 (69, 91)        | 4.1, 6540 | 89 (79, 101)       | 5.1, 207  |
| MBzP  | 11 (9.8, 13)      | 0.2, 857  | 12 (9.9, 13)       | 0.2, 1440 | 14 (11, 16)        | 0.2, 828  |
| MCOP  | 10 (9.1, 12)      | 1.0, 330  | 11 (9.3, 12)       | 0.5, 375  | 12 (11, 14)        | 0.5, 207  |
| MCNP  | 4.9 (4.4, 5.4)    | 0.4, 177  | 4.5 (4.0, 5.0)     | 0.4, 174  | 3.9 (3.5, 4.4)     | 0.4, 66   |
| MEP   | 42 (37, 49)       | 2.0, 7062 | 35 (29, 41)        | 1.8, 4732 | 32 (28, 36)        | 1.3, 2066 |

Abbreviations: geometric mean (GM), 95% confidence intervals (95%CI), summary DEHP (ΣDEHP) = sum of the molar mass of mono-2-ethyl-5-hydroxyhexyl phthalate (MEHHP), mono-2-ethyl-5-oxohexyl phthalate (MEOHP), and mono-2-ethyl-5-carboxypentyl phthalate (MECPP); monobenzyl phthalate (MBzP); monocarboxyoctyl phthalate (MCOP); monocarboxynonyl phthalate (MCNP); monoethyl phthalate (MEP).

Table S5. Median (25th, 75th percentile) of maternal urinary phthalate metabolite concentrations <sup>a</sup> by intervention group (The HOME Study; Cincinnati, OH).

|       | <b>Control</b><br>Median (25 <sup>th</sup> , 75 <sup>th</sup> ) | <b>Intervention</b><br>Median (25 <sup>th</sup> , 75 <sup>th</sup> ) | <b>p-value</b> <sup>b</sup> |
|-------|-----------------------------------------------------------------|----------------------------------------------------------------------|-----------------------------|
| ΣDEHP | 77 (35, 171)                                                    | 104 (47, 228)                                                        | 0.033                       |
| MBP   | 24 (11, 46)                                                     | 26 (13, 54)                                                          | 0.19                        |
| MiBP  | 5.3 (2.0, 8.9)                                                  | 5.0 (1.9, 9.3)                                                       | 0.99                        |
| MCPPP | 2.1 (1.1, 4.3)                                                  | 2.3 (1.3, 3.9)                                                       | 0.64                        |
| MBzP  | 7.3 (3.6, 17.0)                                                 | 10.0 (4.1, 20.3)                                                     | 0.13                        |
| MEP   | 137 (51, 292)                                                   | 149 (66, 381)                                                        | 0.21                        |

<sup>a</sup> Concentrations are average of urinary phthalate metabolites measured at 16- and 26-weeks gestation.

<sup>b</sup> Wilcoxon rank sum test p-value

Abbreviations: summary DEHP (ΣDEHP) = sum of the molar mass of mono-2-ethyl-5-hydroxyhexyl phthalate (MEHHP), mono-2-ethyl-5-oxohexyl phthalate (MEOHP), and mono-2-ethyl-5-carboxypentyl phthalate (MECPP); mono-n-butyl phthalate (MBP); mono-isobutyl phthalate (MiBP); mono(3-carboxypropyl) phthalate (MCPP); monobenzyl phthalate (MBzP); and monoethyl phthalate (MEP).



Table S6. Adjusted geometric mean and percent differences in childhood urinary phthalate metabolite concentrations (ng/mL) for the intervention group compared to the control group: Stratified by baseline dust accumulation (The HOME Study; Cincinnati, OH).<sup>a</sup>

|              | Full Sample    |     |                      | Appears Clean |     |                      | Does not Appear Clean |     |                      | Interaction p-value <sup>c</sup> |
|--------------|----------------|-----|----------------------|---------------|-----|----------------------|-----------------------|-----|----------------------|----------------------------------|
|              | n <sup>b</sup> | GM  | % Difference (95%CI) | n             | GM  | % Difference (95%CI) | n                     | GM  | % Difference (95%CI) |                                  |
| <b>ΣDEHP</b> |                |     |                      |               |     |                      |                       |     |                      | 0.03                             |
| Control      | 343            | 84  | Ref                  | 222           | 83  | Ref                  | 121                   | 86  | Ref                  |                                  |
| Intervention | 337            | 74  | -12 (-23, 1)         | 217           | 65  | -21 (-33, -7)        | 120                   | 92  | 8 (-13, 34)          |                                  |
| <b>MBzP</b>  |                |     |                      |               |     |                      |                       |     |                      | 0.06                             |
| Control      | 343            | 12  | Ref                  | 222           | 12  | Ref                  | 121                   | 14  | Ref                  |                                  |
| Intervention | 337            | 12  | -7 (-22, 12)         | 217           | 9   | -18 (-34, 2)         | 120                   | 16  | 17 (-15, 61)         |                                  |
| <b>MCOP</b>  |                |     |                      |               |     |                      |                       |     |                      | 0.94                             |
| Control      | 343            | 12  | Ref                  | 222           | 11  | Ref                  | 121                   | 13  | Ref                  |                                  |
| Intervention | 337            | 10  | -11 (-21, 2)         | 217           | 10  | -11 (-24, 4)         | 120                   | 11  | -11 (-29, 12)        |                                  |
| <b>MCNP</b>  |                |     |                      |               |     |                      |                       |     |                      | 0.37                             |
| Control      | 343            | 4.7 | Ref                  | 222           | 4.5 | Ref                  | 121                   | 5.2 | Ref                  |                                  |
| Intervention | 337            | 4.2 | -12 (-22, 0)         | 217           | 3.8 | -15 (-28, -1)        | 120                   | 4.9 | -5 (-23, 17)         |                                  |
| <b>MEP</b>   |                |     |                      |               |     |                      |                       |     |                      | 0.67                             |
| Control      | 343            | 36  | Ref                  | 222           | 31  | Ref                  | 121                   | 46  | Ref                  |                                  |
| Intervention | 337            | 37  | 5 (-15, 30)          | 217           | 31  | 2 (-22, 33)          | 120                   | 52  | 13 (-20, 60)         |                                  |

<sup>a</sup> Models adjusted for child age (years) and log<sub>10</sub>-transformed urinary creatinine concentrations.

<sup>b</sup> The n column is the number of observations for 288 participants (145 control and 143 intervention group).

<sup>c</sup> Interaction p-value for intervention x dust accumulation/cleaning product interaction term.

Abbreviations: geometric mean (GM), 95% confidence intervals (95%CI), summary DEHP (ΣDEHP) = sum of the molar mass of mono-2-ethyl-5-hydroxyhexyl phthalate (MEHHP), mono-2-ethyl-5-oxohexyl phthalate (MEOHP), and mono-2-ethyl-5-carboxypentyl phthalate (MECPP); monobenzyl phthalate (MBzP); monocarboxyoctyl phthalate (MCOP); monocarboxynonyl phthalate (MCNP); monoethyl phthalate (MEP).

Table S7. Baseline characteristics for participants in the control and intervention group: Stratified by participant moving in the first 3 years (The HOME Study; Cincinnati, OH).

|                                 | Participants who moved |         |              | Participants who did not move |         |              |
|---------------------------------|------------------------|---------|--------------|-------------------------------|---------|--------------|
|                                 | Total                  | Control | Intervention | Total                         | Control | Intervention |
|                                 | n (%)                  | n (%)   | n (%)        | n (%)                         | n (%)   | n (%)        |
| <b>Total</b>                    | 127 (100)              | 62 (49) | 65 (51)      | 161 (100)                     | 83 (52) | 78 (48)      |
| <b>Child Sex</b>                |                        |         |              |                               |         |              |
| Male                            | 56 (44)                | 24 (39) | 32 (49)      | 79 (49)                       | 39 (47) | 40 (51)      |
| Female                          | 71 (56)                | 38 (61) | 33 (51)      | 82 (51)                       | 44 (53) | 38 (49)      |
| <b>Child Race/Ethnicity</b>     |                        |         |              |                               |         |              |
| Non-Hispanic White              | 64 (52)                | 35 (58) | 29 (45)      | 137 (85)                      | 72 (87) | 65 (83)      |
| Non-Hispanic Black              | 49 (40)                | 21 (35) | 28 (44)      | 16 (10)                       | 8 (10)  | 8 (10)       |
| Hispanic                        | 4 (3)                  | 1 (2)   | 3 (5)        | 3 (2)                         | 2 (2)   | 1 (1)        |
| Other                           | 7 (6)                  | 3 (5)   | 4 (6)        | 5 (3)                         | 1 (1)   | 4 (5)        |
| <b>Marital Status</b>           |                        |         |              |                               |         |              |
| Married, or living with someone | 89 (70)                | 46 (74) | 43 (66)      | 152 (94)                      | 79 (95) | 73 (94)      |
| Not married, or living alone    | 38 (30)                | 16 (26) | 22 (34)      | 9 (6)                         | 4 (5)   | 5 (6)        |
| <b>Household Income</b>         |                        |         |              |                               |         |              |
| <20                             | 40 (32)                | 18 (29) | 22 (34)      | 6 (4)                         | 4 (5)   | 2 (3)        |
| 20 - <40                        | 27 (21)                | 13 (21) | 14 (22)      | 12 (7)                        | 7 (8)   | 5 (6)        |
| 40-70                           | 30 (24)                | 17 (27) | 13 (20)      | 45 (28)                       | 23 (28) | 22 (28)      |
| >\$70                           | 30 (24)                | 14 (23) | 16 (25)      | 98 (61)                       | 49 (59) | 49 (63)      |
| <b>Maternal Education</b>       |                        |         |              |                               |         |              |
| Bachelor's Degree or Higher     | 55 (43)                | 27 (44) | 28 (43)      | 116 (72)                      | 58 (70) | 58 (74)      |
| Tech/Some College               | 37 (29)                | 21 (34) | 16 (25)      | 35 (22)                       | 19 (23) | 16 (21)      |
| High School or Less             | 35 (28)                | 14 (23) | 21 (32)      | 10 (6)                        | 6 (7)   | 4 (5)        |
| <b>Dust Accumulation</b>        |                        |         |              |                               |         |              |
| Appears clean                   | 65 (51)                | 31 (50) | 34 (52)      | 118 (73)                      | 61 (73) | 57 (73)      |
| Some or No cleaning             | 62 (49)                | 31 (50) | 31 (48)      | 43 (27)                       | 22 (27) | 21 (27)      |
| <b>Home Ownership</b>           |                        |         |              |                               |         |              |
| Own                             | 68 (54)                | 36 (59) | 32 (49)      | 146 (91)                      | 75 (90) | 71 (91)      |
| Rent                            | 43 (34)                | 19 (31) | 24 (37)      | 12 (7)                        | 6 (7)   | 6 (8)        |
| Public                          | 13 (10)                | 5 (8)   | 8 (12)       | 3 (2)                         | 2 (2)   | 1 (1)        |
| Other                           | 2 (2)                  | 1 (2)   | 1 (2)        | 0 (0)                         | 0 (0)   | 0 (0)        |

Table S8. Adjusted geometric mean and percent differences in childhood urinary phthalate metabolite concentrations (ng/mL) for the intervention group compared to the control group using a per protocol analysis with participants who moved before 36-month visit excluded (The HOME Study; Cincinnati, OH).<sup>a</sup>

|              | Full Sample    |     |                         | Appears Clean |     |                         | Does not appear Clean |     |                         | Interaction          |
|--------------|----------------|-----|-------------------------|---------------|-----|-------------------------|-----------------------|-----|-------------------------|----------------------|
|              | n <sup>b</sup> | GM  | % Difference<br>(95%CI) | n             | GM  | % Difference<br>(95%CI) | n                     | GM  | % Difference<br>(95%CI) | p-value <sup>c</sup> |
| <b>ΣDEHP</b> |                |     |                         |               |     |                         |                       |     |                         | 0.07                 |
| Control      | 195            | 76  | Ref                     | 143           | 75  | Ref                     | 52                    | 79  | Ref                     |                      |
| Intervention | 179            | 63  | -17 (-32, 0)            | 136           | 56  | -26 (-41, -7)           | 43                    | 88  | 12 (-22, 60)            |                      |
| <b>MBzP</b>  |                |     |                         |               |     |                         |                       |     |                         | 0.52                 |
| Control      | 195            | 11  | Ref                     | 143           | 10  | Ref                     | 52                    | 15  | Ref                     |                      |
| Intervention | 179            | 9   | -16 (-34, 6)            | 136           | 9   | -12 (-34, 17)           | 43                    | 11  | -26 (-51, 12)           |                      |
| <b>MCOP</b>  |                |     |                         |               |     |                         |                       |     |                         | 0.96                 |
| Control      | 195            | 10  | Ref                     | 143           | 10  | Ref                     | 52                    | 12  | Ref                     |                      |
| Intervention | 179            | 10  | -6 (-21, 12)            | 136           | 9   | -6 (-24, 16)            | 43                    | 11  | -5 (-32, 32)            |                      |
| <b>MCNP</b>  |                |     |                         |               |     |                         |                       |     |                         | 0.71                 |
| Control      | 195            | 4.3 | Ref                     | 143           | 4.0 | Ref                     | 52                    | 5.0 | Ref                     |                      |
| Intervention | 179            | 3.9 | -9 (-23, 7)             | 136           | 3.6 | -11 (-26, 8)            | 43                    | 4.7 | -5 (-31, 31)            |                      |
| <b>MEP</b>   |                |     |                         |               |     |                         |                       |     |                         | 0.74                 |
| Control      | 195            | 31  | Ref                     | 143           | 27  | Ref                     | 52                    | 45  | Ref                     |                      |
| Intervention | 179            | 28  | -9 (-30, 20)            | 136           | 26  | -6 (-32, 29)            | 43                    | 38  | -15 (-49, 42)           |                      |

<sup>a</sup> Models adjusted for child age (years) and log<sub>10</sub>-transformed urinary creatinine concentrations.

<sup>b</sup> The n column is the number of observations for 161 participants (83 control and 78 intervention group).

<sup>c</sup> Interaction p-value for intervention x dust accumulation/cleaning product interaction term.

Abbreviations: geometric mean (GM), 95% confidence intervals (95%CI), summary DEHP (ΣDEHP) = sum of the molar mass of mono-2-ethyl-5-hydroxyhexyl phthalate (MEHHP), mono-2-ethyl-5-oxohexyl phthalate (MEOHP), and mono-2-ethyl-5-carboxypentyl phthalate (MECPP); monobenzyl phthalate (MBzP); monocarboxyoctyl phthalate (MCOP); monocarboxynonyl phthalate (MCNP); monoethyl phthalate (MEP).

Table S9. Participant characteristics according to dust accumulation (The HOME Study; Cincinnati, OH).

|                                                      | Total |       | No Cleaning |       | Some Cleaning |      | Appears Clean |      |
|------------------------------------------------------|-------|-------|-------------|-------|---------------|------|---------------|------|
|                                                      | n     | (%)   | n           | (%)   | n             | (%)  | n             | (%)  |
| <b>Total*</b>                                        | 280   | (100) | 12          | (4)   | 110           | (39) | 158           | (56) |
| <b>Child Gender</b>                                  |       |       |             |       |               |      |               |      |
| Male                                                 | 133   | (48)  | 4           | (33)  | 55            | (50) | 74            | (47) |
| Female                                               | 147   | (53)  | 8           | (67)  | 55            | (50) | 84            | (53) |
| <b>Child Race/Ethnicity</b>                          |       |       |             |       |               |      |               |      |
| Non-Hispanic white                                   | 196   | (70)  | 0           | (0)   | 71            | (65) | 125           | (79) |
| Non-Hispanic black                                   | 65    | (23)  | 12          | (100) | 32            | (29) | 21            | (13) |
| Hispanic                                             | 7     | (3)   | 0           | (0)   | 1             | (1)  | 6             | (4)  |
| Other                                                | 11    | (4)   | 0           | (0)   | 5             | (5)  | 6             | (4)  |
| <b>Marital Status</b>                                |       |       |             |       |               |      |               |      |
| Married, or living with someone                      | 236   | (84)  | 2           | (17)  | 93            | (85) | 141           | (89) |
| Not married, or living alone                         | 44    | (16)  | 10          | (83)  | 17            | (15) | 17            | (11) |
| <b>Household Income</b>                              |       |       |             |       |               |      |               |      |
| <\$20,000                                            | 40    | (14)  | 9           | (75)  | 22            | (20) | 9             | (6)  |
| \$20,000 - <\$40,000                                 | 29    | (10)  | 2           | (17)  | 15            | (14) | 12            | (8)  |
| \$40,000-\$70,000                                    | 68    | (24)  | 1           | (8)   | 30            | (27) | 37            | (23) |
| >\$70,000                                            | 143   | (51)  | 0           | (0)   | 43            | (39) | 100           | (63) |
| <b>Maternal Education</b>                            |       |       |             |       |               |      |               |      |
| Bachelor's degree or higher                          | 167   | (60)  | 1           | (8)   | 48            | (44) | 118           | (75) |
| Tech/some college                                    | 71    | (25)  | 5           | (42)  | 39            | (35) | 27            | (17) |
| High school or less                                  | 42    | (15)  | 6           | (50)  | 23            | (21) | 13            | (8)  |
| <b>Flooring</b>                                      |       |       |             |       |               |      |               |      |
| High carpet                                          | 26    | (9)   | 0           | (0)   | 11            | (10) | 15            | (10) |
| Mid carpet                                           | 112   | (40)  | 3           | (25)  | 46            | (42) | 63            | (40) |
| Low carpet                                           | 108   | (39)  | 5           | (42)  | 39            | (35) | 64            | (41) |
| Wood/tile/ceramic                                    | 30    | (11)  | 3           | (25)  | 12            | (11) | 15            | (10) |
| Vinyl                                                | 3     | (1)   | 1           | (8)   | 2             | (2)  | 0             | (0)  |
| <b>Child puts toys in mouth: <sup>a</sup></b>        |       |       |             |       |               |      |               |      |
| None                                                 | 7     | (3)   | 0           | (0)   | 0             | (0)  | 7             | (4)  |
| Monthly                                              | 11    | (4)   | 3           | (25)  | 2             | (2)  | 6             | (4)  |
| Weekly                                               | 14    | (5)   | 1           | (8)   | 4             | (4)  | 9             | (6)  |
| Daily                                                | 245   | (88)  | 8           | (67)  | 102           | (94) | 135           | (86) |
| <b>Child sucks on thumb or fingers: <sup>a</sup></b> |       |       |             |       |               |      |               |      |
| No                                                   | 162   | (58)  | 6           | (50)  | 62            | (57) | 94            | (60) |
| Yes                                                  | 115   | (42)  | 6           | (50)  | 46            | (43) | 63            | (40) |
| <b>Child uses pacifier: <sup>a</sup></b>             |       |       |             |       |               |      |               |      |
| No                                                   | 180   | (65)  | 11          | (92)  | 70            | (65) | 99            | (63) |
| Yes                                                  | 97    | (35)  | 1           | (8)   | 38            | (35) | 58            | (37) |
| <b>Pre-packaged fruit consumption: <sup>b</sup></b>  |       |       |             |       |               |      |               |      |
| At least once a day                                  | 133   | (51)  | 3           | (27)  | 53            | (51) | 77            | (52) |
| 1-6 times a week                                     | 70    | (27)  | 1           | (9)   | 35            | (34) | 34            | (23) |
| Less than 3 times a month                            | 59    | (23)  | 7           | (64)  | 16            | (15) | 36            | (24) |
| <b>Pre-packaged vegetables: <sup>b</sup></b>         |       |       |             |       |               |      |               |      |
| At least once a day                                  | 134   | (51)  | 3           | (27)  | 55            | (53) | 76            | (52) |
| 1-6 times a week                                     | 69    | (26)  | 2           | (18)  | 33            | (32) | 34            | (23) |
| Less than 3 times a month                            | 59    | (23)  | 6           | (55)  | 16            | (15) | 37            | (25) |
| <b>Breastfeeding Duration <sup>b</sup></b>           |       |       |             |       |               |      |               |      |
| Never                                                | 36    | (14)  | 4           | (36)  | 13            | (13) | 19            | (13) |
| >0-6 months                                          | 106   | (40)  | 5           | (45)  | 43            | (41) | 58            | (39) |
| >6 months                                            | 120   | (46)  | 2           | (18)  | 48            | (46) | 70            | (48) |
| <b>Intervention group</b>                            |       |       |             |       |               |      |               |      |
| Control                                              | 139   | (50)  | 6           | (50)  | 57            | (52) | 76            | (48) |
| Intervention                                         | 141   | (50)  | 6           | (50)  | 53            | (48) | 82            | (52) |

Includes first observation only; <sup>a</sup> missing = 3; <sup>b</sup> missing = 18  
Total observations = 650

Table S10. Adjusted geometric mean and percent differences in childhood urinary phthalate metabolite concentrations (ng/mL) according to dust accumulation (The HOME Study; Cincinnati, OH).<sup>a</sup>

|                       | n <sup>b</sup> | GM  | % Difference (95%CI) |
|-----------------------|----------------|-----|----------------------|
| <b>∑DEHP</b>          |                |     |                      |
| Does not appear clean | 268            | 93  | Ref                  |
| Appears clean         | 382            | 82  | -12 (-24, 1)         |
| <b>MBzP</b>           |                |     |                      |
| Does not appear clean | 268            | 18  | Ref                  |
| Appears clean         | 382            | 15  | -17 (-30, -2)        |
| <b>MCOP</b>           |                |     |                      |
| Does not appear clean | 268            | 12  | Ref                  |
| Appears clean         | 382            | 11  | -12 (-23, 1)         |
| <b>MCNP</b>           |                |     |                      |
| Does not appear clean | 268            | 5.1 | Ref                  |
| Appears clean         | 382            | 4.2 | -16 (-25, -5)        |
| <b>MEP</b>            |                |     |                      |
| Does not appear clean | 268            | 58  | Ref                  |
| Appears clean         | 382            | 58  | 0 (-16, 19)          |

<sup>a</sup> Model adjusted for child age (continuous), sex (male vs. female), race/ethnicity (Non-Hispanic white vs. Non-Hispanic Black vs. Hispanic or other race/ethnicity), log<sub>10</sub>-transformed urinary creatinine concentration (continuous), flooring type (carpet vs. non-carpet), maternal education (Bachelor's degree or higher vs. Tech/some college vs. High school or less), intervention group (lead hazard intervention vs. control group), household income (<\$20,000 vs. \$20,000 to <\$40,000 vs. \$40,000 to \$70,000 vs. >\$70,000), and season (spring vs. summer vs. fall vs. winter).

<sup>b</sup> The n column is the number of repeated measures 280 participants (122 Does not appear clean and 158 appears clean).

Abbreviations: geometric mean (GM), 95% confidence intervals (95%CI), summary DEHP (∑DEHP) = sum of the molar mass of mono-2-ethyl-5-hydroxyhexyl phthalate (MEHHP), mono-2-ethyl-5-oxohexyl phthalate (MEOHP), and mono-2-ethyl-5-carboxypentyl phthalate (MECPP); monobenzyl phthalate (MBzP); monocarboxyoctyl phthalate (MCOP); monocarboxynonyl phthalate (MCNP); monoethyl phthalate (MEP).

Table S11. Adjusted geometric mean and percent differences in childhood urinary phthalate metabolite concentrations (ng/mL) according to three categories of dust accumulation: Sensitivity analyses (The HOME Study; Cincinnati, OH).<sup>a</sup>

|                            | Creatinine Adjusted |     |                      | Creatinine Standardized |                      | Trend test p-value <sup>c</sup> |
|----------------------------|---------------------|-----|----------------------|-------------------------|----------------------|---------------------------------|
|                            | n <sup>b</sup>      | GM  | % Difference (95%CI) | GM                      | % Difference (95%CI) |                                 |
| <b>ΣDEHP</b>               |                     |     |                      |                         |                      | 0.014                           |
| No cleaning/ heavy dust    | 27                  | 129 | Ref                  | 439                     | Ref                  |                                 |
| Some cleaning/ slight dust | 241                 | 89  | -31 (-51, -3)        | 298                     | -32 (-52, -4)        |                                 |
| Appears Clean              | 382                 | 79  | -39 (-57, -12)       | 264                     | -40 (-58, -14)       |                                 |
| <b>MBzP</b>                |                     |     |                      |                         |                      | 0.005                           |
| No cleaning/ heavy dust    | 27                  | 27  | Ref                  | 94                      | Ref                  |                                 |
| Some cleaning/ slight dust | 241                 | 17  | -37 (-58, -5)        | 57                      | -39 (-60, -7)        |                                 |
| Appears Clean              | 382                 | 14  | -47 (-65, -18)       | 48                      | -49 (-67, -21)       |                                 |
| <b>MCOP</b>                |                     |     |                      |                         |                      | 0.023                           |
| No cleaning/ heavy dust    | 27                  | 15  | Ref                  | 51                      | Ref                  |                                 |
| Some cleaning/ slight dust | 241                 | 12  | -22 (-44, 7)         | 39                      | -23 (-45, 6)         |                                 |
| Appears Clean              | 382                 | 10  | -31 (-50, -3)        | 35                      | -32 (-51, -5)        |                                 |
| <b>MCNP</b>                |                     |     |                      |                         |                      | 0.005                           |
| No cleaning/ heavy dust    | 27                  | 5.4 | Ref                  | 18                      | Ref                  |                                 |
| Some cleaning/ slight dust | 241                 | 5.0 | -6 (-29, 25)         | 17                      | -6 (-29, 25)         |                                 |
| Appears Clean              | 382                 | 4.3 | -20 (-41, 7)         | 14                      | -20 (-41, 7)         |                                 |
| <b>MEP</b>                 |                     |     |                      |                         |                      | 0.710                           |
| No cleaning/ heavy dust    | 27                  | 48  | Ref                  | 156                     | Ref                  |                                 |
| Some cleaning/ slight dust | 241                 | 60  | 25 (-18, 91)         | 196                     | 26 (-18, 92)         |                                 |
| Appears Clean              | 382                 | 59  | 24 (-20, 92)         | 195                     | 25 (-20, 94)         |                                 |

<sup>a</sup> Model adjusted for child age (continuous), sex (male vs. female), race/ethnicity (Non-Hispanic white vs. Non-Hispanic Black vs. Hispanic or other race/ethnicity), flooring type (carpet vs. non-carpet), maternal education (Bachelor's degree or higher vs. Tech/some college vs. High school or less), intervention group (lead hazard intervention vs. control group), household income (<\$20,000 vs. \$20,000 to <\$40,000 vs. \$40,000 to \$70,000 vs. >\$70,000), and season (spring vs. summer vs. fall vs. winter). Creatinine adjusted model also adjusted for log<sub>10</sub>-transformed urinary creatinine concentration (continuous).

<sup>b</sup> The n column is the number of observations for 280 participants (12 No cleaning, 110 Some cleaning, 158 Appears clean).

<sup>c</sup> Trend test p-value for dust accumulation from creatinine-adjusted model.

Abbreviations: geometric mean (GM), 95% confidence intervals (95%CI), summary DEHP (ΣDEHP) = sum of the molar mass of mono-2-ethyl-5-hydroxyhexyl phthalate (MEHHP), mono-2-ethyl-5-oxohexyl phthalate (MEOHP), and mono-2-ethyl-5-carboxypentyl phthalate (MECPP); monobenzyl phthalate (MBzP); monocarboxyoctyl phthalate (MCOP); monocarboxynonyl phthalate (MCNP); monoethyl phthalate (MEP).

Table S12. Adjusted geometric mean and percent differences in childhood creatinine-standardized urinary phthalate metabolite concentrations (ng/mL) for the intervention group compared to the control group.<sup>a</sup>

|              | n <sup>b</sup> | GM  | %Difference (95%CI) |
|--------------|----------------|-----|---------------------|
| <b>ΣDEHP</b> |                |     |                     |
| Control      | 343            | 276 | Ref                 |
| Intervention | 337            | 246 | -11 (-22, 2)        |
| <b>MBzP</b>  |                |     |                     |
| Control      | 343            | 41  | Ref                 |
| Intervention | 337            | 38  | -6 (-22, 14)        |
| <b>MCOP</b>  |                |     |                     |
| Control      | 343            | 38  | Ref                 |
| Intervention | 337            | 34  | -10 (-21, 2)        |
| <b>MCNP</b>  |                |     |                     |
| Control      | 343            | 16  | Ref                 |
| Intervention | 337            | 14  | -12 (-22, 0)        |
| <b>MEP</b>   |                |     |                     |
| Control      | 343            | 118 | Ref                 |
| Intervention | 337            | 124 | 5 (-15, 30)         |

<sup>a</sup> Model adjusted for child age (years).

<sup>b</sup> The n column is the number of observations for 288 participants (145 control and 143 intervention group).

Abbreviations: geometric mean (GM), 95% confidence intervals (95%CI), summary DEHP (ΣDEHP) = sum of the molar mass of mono-2-ethyl-5-hydroxyhexyl phthalate (MEHHP), mono-2-ethyl-5-oxohexyl phthalate (MEOHP), and mono-2-ethyl-5-carboxypentyl phthalate (MECPP); monobenzyl phthalate (MBzP); monocarboxyoctyl phthalate (MCOP); monocarboxynonyl phthalate (MCNP); monoethyl phthalate (MEP).

Table S13. Adjusted geometric mean and percent differences in childhood urinary phthalate metabolite concentrations (ng/mL) by dust accumulation: Sensitivity analyses considering different sets of covariates.

|                       | Model 1: Minimally-Adjusted |     |                      | Model 2: Fully Adjusted |     |                      | Model 3: Additional Covariates |     |                      |
|-----------------------|-----------------------------|-----|----------------------|-------------------------|-----|----------------------|--------------------------------|-----|----------------------|
|                       | n <sup>a</sup>              | GM  | % Difference (95%CI) | n                       | GM  | % Difference (95%CI) | n                              | GM  | % Difference (95%CI) |
| <b>ΣDEHP</b>          |                             |     |                      |                         |     |                      |                                |     |                      |
| Does not appear clean | 268                         | 86  | Ref                  | 268                     | 93  | Ref                  | 250                            | 90  | Ref                  |
| Appears clean         | 382                         | 73  | -15 (-25, -3)        | 382                     | 82  | -12 (-24, 1)         | 355                            | 78  | -14 (-26, 0)         |
| <b>MBzP</b>           |                             |     |                      |                         |     |                      |                                |     |                      |
| Does not appear clean | 268                         | 14  | Ref                  | 268                     | 18  | Ref                  | 250                            | 17  | Ref                  |
| Appears clean         | 382                         | 10  | -29 (-39, -16)       | 382                     | 15  | -17 (-30, -2)        | 355                            | 14  | -16 (-29, 0)         |
| <b>MCOP</b>           |                             |     |                      |                         |     |                      |                                |     |                      |
| Does not appear clean | 268                         | 12  | Ref                  | 268                     | 12  | Ref                  | 250                            | 12  | Ref                  |
| Appears clean         | 382                         | 10  | -11 (-21, 1)         | 382                     | 11  | -12 (-23, 1)         | 355                            | 11  | -10 (-22, 3)         |
| <b>MCNP</b>           |                             |     |                      |                         |     |                      |                                |     |                      |
| Does not appear clean | 268                         | 4.9 | Ref                  | 268                     | 5.1 | Ref                  | 250                            | 4.8 | Ref                  |
| Appears clean         | 382                         | 4.1 | -15 (-24, -5)        | 382                     | 4.2 | -16 (-25, -5)        | 355                            | 4.1 | -15 (-25 -4)         |
| <b>MEP</b>            |                             |     |                      |                         |     |                      |                                |     |                      |
| Does not appear clean | 268                         | 42  | Ref                  | 268                     | 58  | Ref                  | 250                            | 60  | Ref                  |
| Appears clean         | 382                         | 33  | -22 (-34, -7)        | 382                     | 58  | 0 (-16, 19)          | 355                            | 59  | -2 (-18, 18)         |

<sup>a</sup> The n column is the number of observations for 280 participants.

Model 1: child age (continuous), sex (male vs. female), log<sub>10</sub>-transformed urinary creatinine concentrations (continuous), intervention group (lead hazard intervention vs. control group); n=280; observations = 650

Model 2: child age (continuous), sex (male vs. female), log<sub>10</sub>-transformed urinary creatinine concentrations (continuous), intervention group (lead hazard intervention vs. control group), race/ethnicity (Non-Hispanic white vs. Non-Hispanic Black vs. Hispanic or other race/ethnicity), flooring type (carpet vs. non-carpet), maternal education (Bachelor's degree or higher vs. Tech/some college vs. High school or less), household income (<\$20,000 vs. \$20,000 to <\$40,000 vs. \$40,000 to \$70,000 vs. >\$70,000), and season (spring vs. summer vs. fall vs, winter); n=280; observations = 650

Model 3: child age (continuous), sex (male vs. female), log<sub>10</sub>-transformed urinary creatinine concentrations (continuous), intervention group (lead hazard intervention vs. control group), race/ethnicity (Non-Hispanic white vs. Non-Hispanic Black vs. Hispanic or other race/ethnicity), flooring type (carpet vs. non-carpet), maternal education (Bachelor's degree or higher vs. Tech/some college vs. High school or less), household income (<\$20,000 vs. \$20,000 to <\$40,000 vs. \$40,000 to \$70,000 vs. >\$70,000), season (spring vs. summer vs. fall vs, winter), duration of breastfeeding (never vs. >0-6 months vs. >6 months), pacifier use (no vs. yes), toy mouthing behaviors (less than daily vs. daily), and prepackage food consumption (combined measure of consumption of prepackaged fruit or consumption of prepackaged vegetables: at least once a day vs. 1-6 times a week vs. less than 3 times a month); n=260; observations = 605.

Abbreviations: geometric mean (GM), 95% confidence intervals (95%CI), summary DEHP (ΣDEHP) = sum of the molar mass of mono-2-ethyl-5-hydroxyhexyl phthalate (MEHHP), mono-2-ethyl-5-oxohexyl phthalate (MEOHP), and mono-2-ethyl-5-carboxypentyl phthalate (MECPP); monobenzyl phthalate (MBzP); monocarboxyoctyl phthalate (MCOP); monocarboxynonyl phthalate (MCNP); monoethyl phthalate (MEP).
